# Supplementary material
Source: ML conference proceedings conference paper supplement (https://proceedings.neurips.cc/paper_files/paper/2010/hash/fc8001f834f6a5f0561080d134d53d29-Abstract.html)
Supplement: Supplementary file [file fc8001f834f6a5f0561080d134d53d29-Supplemental.zip]

## Copula Processes Supplementary Material

In this supplement, we briefly expand on some points in the main text of our paper.

### Gaussian Copula Covariance Matrix

For the Gaussian Copula in (9), the prior  $\Gamma_{ij} = \text{cov}(g^{-1}(\sigma_i), g^{-1}(\sigma_j)) = \text{cov}(f_i, f_j) = k(t_i, t_j)$ . The posterior  $\Gamma_{ij}$  can be estimated as the covariance matrix of the Laplace approximation for  $p(\mathbf{f}|\mathbf{y})$ . Also, since each component of  $\mathbf{f}$  is transformed separately, such that  $\sigma(t_i) = g(f(t_i))$ , we have

$$p(\boldsymbol{\sigma}|\mathbf{y}, \mathbf{z}) = \left[ \prod_{i=1}^N \frac{df_i}{d\sigma_i} \right] p(\mathbf{f}|\mathbf{y}, \mathbf{z}) = \left[ \prod_{i=1}^N \frac{1}{g'(f_i, \boldsymbol{\omega})} \right] p(\mathbf{f}|\mathbf{y}, \mathbf{z}). \quad (1)$$

One can use this to simulate from the joint distribution over the deviations.

### Laplace Approximation

A comment about our modification to Newton's method:

At a maximum, the negative Hessian of the objective function,  $W + K^{-1}$ , is positive definite. On each iteration of Newton's method, we form  $M$  by setting all negative entries of  $W$  to zero. Since  $K^{-1}$  is positive definite, and the eigenvalues of  $M + K^{-1}$  are greater than or equal to the eigenvalues of  $K^{-1}$ ,  $M + K^{-1}$  is always positive definite. Using  $M$  in place of  $W$  decreases the Newton step size, and changes the direction of steps.

Also,  $B = I + M^{\frac{1}{2}} K M^{\frac{1}{2}}$ , is often well conditioned, since it has eigenvalues no smaller than 1, and no larger than  $1 + n \max_{ij} (K_{ij})/4$ .
